# Supplementary material for: Investigation of nitrous oxide decomposition over highly active and stable bimetallic CoFe-MOR zeolite catalyst: effective removal and mechanism study
Source: Royal Society of Chemistry journal article supplement (doi:10.1039/c2cy00445c), 2012-01-01
Supplement: c2cy00445c.pdf [file c2cy00445c.pdf]

## 1. Experimental Section

### 1.2 Material characterization

Extended X-ray absorption fine structure (EXAFS) data of Co-MOR and CoFe-MOR were measured on beamline 4W1B at the Beijing Synchrotron Radiation Facility (BSRF). A spectral range of 7600 to 8450 eV from the K-absorption edge of Co (7715 eV) was collected under ambient conditions. Si(111) monochromator crystals were used and the XAFS spectra of adsorption samples were collected with a Lytle ionization detector in fluorescence mode due to the relatively low Co concentration in the catalysts. The fluorescence signal was filtered by a Cu foil and radial Soller slit assembly to reduce the elastically scattered radiation. An average of three scans was performed to achieve an adequate signal/noise ratio. The energy of the Co K-adsorption edge (7715 eV) was calibrated with Co foil.

The XAFS data were processed following the standard procedure of background absorption removal, normalization, conversion to k-space, and Fourier transformation, and then the EXAFS geometric information as extracted by use of the WinXAS 3.1 software package<sup>24-25</sup> with Fourier filtering and shell fitting. A linear function fit for the pre-edge region and a second-order polynomial fit in the post-edge region were used for normalization to remove the background absorption. Subsequently for EXAFS analysis, normalized spectra were converted to frequency (k) space by use of a cubic spline, weighted by  $k^3$ , and weighted  $k^3\chi(k)$  spectra were generated. The  $k^3\chi(k)$  spectra, from 2.0 to 12.5  $\text{\AA}^{-1}$ , were Fourier-transformed (FT) by use of a Bessel window function with smoothing parameter of 4 to produce the radial structure

function (RSF) in R-space. The structural parameters of adsorption samples and cobalt oxide reference were determined by fitting theoretical phase-shift and amplitude functions of Co-O and Co-Co scattering paths calculated by ab initio FEFF8.2 code for the cluster of CoO and Co<sub>2</sub>SiO<sub>4</sub>.

Table S1 Comparison of catalytic activity of CoFe-MOR with the best zeolitic catalysts for N<sub>2</sub>O decomposition

| Catalyst                 | GHSV(h <sup>-1</sup> ) <i>P</i> (bar) | Feed composition                                                                      | <i>T</i> (K) <i>X</i> (N <sub>2</sub> O)(%) |
|--------------------------|---------------------------------------|---------------------------------------------------------------------------------------|---------------------------------------------|
| Fe-USY <sup>12</sup>     | 30,000,1                              | 10% N <sub>2</sub> O, 20%O <sub>2</sub> , 2% H <sub>2</sub> O in He                   | 773K, 98                                    |
| Co-MOR <sup>23</sup>     | 30,000,1                              | 5000 ppm N <sub>2</sub> O, 1000 ppm NO, 5% O <sub>2</sub> , 2% H <sub>2</sub> O in He | 798K, 92                                    |
| CoFe-MOR                 | 30,000,1                              | 5000 ppm N <sub>2</sub> O, 1000 ppm NO, 5% O <sub>2</sub> , 2% H <sub>2</sub> O in He | 693K, 90                                    |
| Ir/Fe-USY <sup>30</sup>  | 30,000,1                              | 5000 ppm N <sub>2</sub> O, 700 ppm NO, 5%O <sub>2</sub> , 2% H <sub>2</sub> O in He   | 673, 95                                     |
| [Fe,Al]MFI <sup>31</sup> | 60,000,1                              | 1500 ppm N <sub>2</sub> O, 400 ppm NO, 2%O <sub>2</sub> in He                         | 725, 90                                     |

*P*: total pressure, *T*: temperature, *X*(N<sub>2</sub>O)=N<sub>2</sub>O conversion

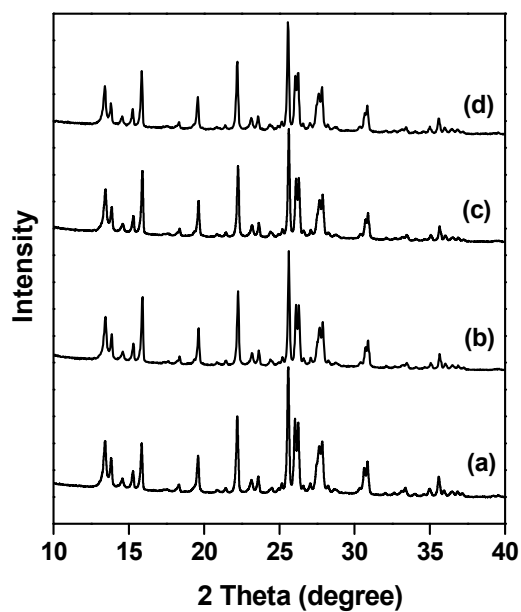

**Fig. S1** XRD profiles of (a) Co-MOR, (b) CoFe-MOR, (c) FeCo-MOR and (d) Fe-MOR.

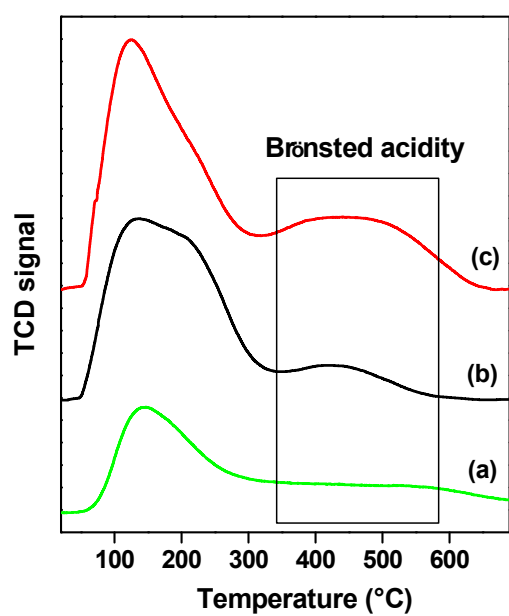

**Fig. S2** NH<sub>3</sub>-TPD profile of (a) CoFe-MOR, (b) Co-MOR and (c) H-MOR.
